# Supplementary material
Source: PubMed Central journal article supplement (PMC3589153)
Supplement: mt2012269x1.pdf [file mt2012269x1.pdf]

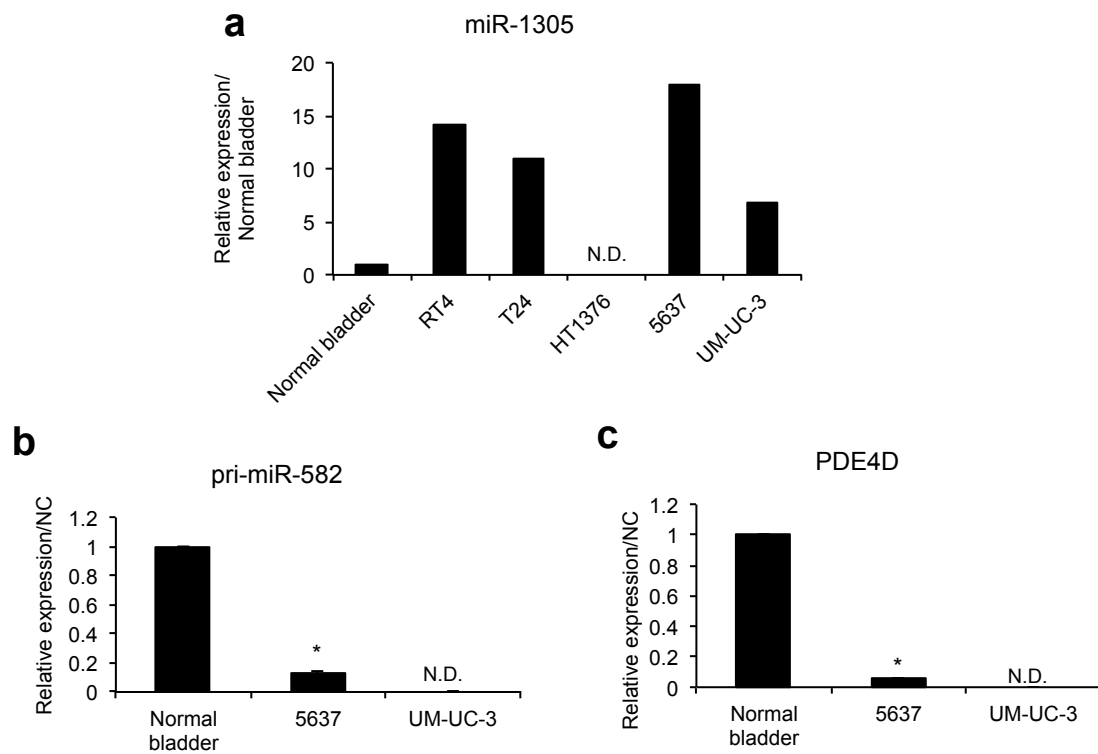

**Supplementary Figure S1. Expression of miR-1305, pri-miR-582 and PDE4D in human bladder cancer cell lines.** (a) Expression level of miR-1305 in human bladder cancer cell lines. The relative expression of miR-1305 for each of the cell lines was calculated compared with the level in normal bladder tissue RNA. (b,c) Expression level of pri-miR-582 and *PDE4D* in UM-UC-3 and 5637 cells. The relative expressions were calculated compared with the level in normal bladder tissue RNA ( $n=3$ ). \* $P < 0.05$  versus NC.
