# Supplementary material
Source: PubMed Central journal article supplement (PMC3589153)
Supplement: mt2012269x2.pdf [file mt2012269x2.pdf]

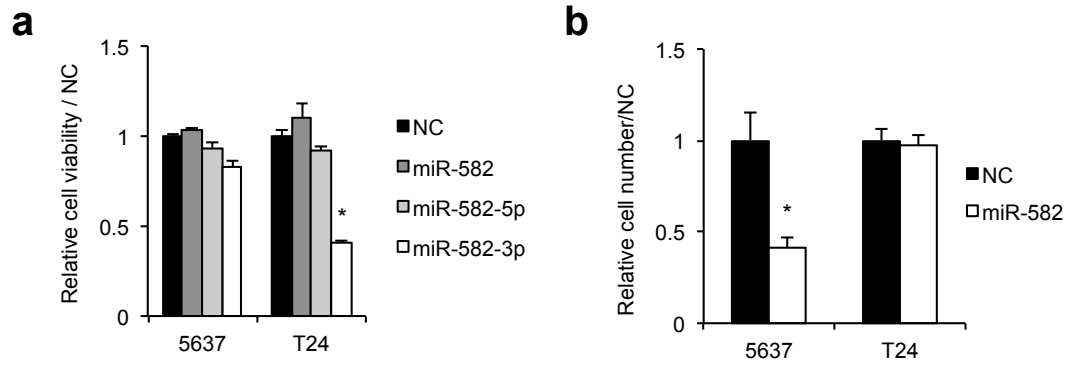

**Supplementary Figure S2. Functions of miR-582 in T24 and 5637 cells.** (a) Effect of miR-582-5p and -3p on the proliferation of T24 and 5637 cells. Proliferation values were normalized to values from cells treated with NC ( $n=6$ ). (b) Effect of miR-582 on the invasion of T24 and 5637 cells. Invasive values were normalized to values from cells treated with NC ( $n=4$ ). \* $P < 0.05$  versus NC.
