# Supplementary material
Source: PubMed Central journal article supplement (PMC3589153)
Supplement: mt2012269x3.pdf [file mt2012269x3.pdf]

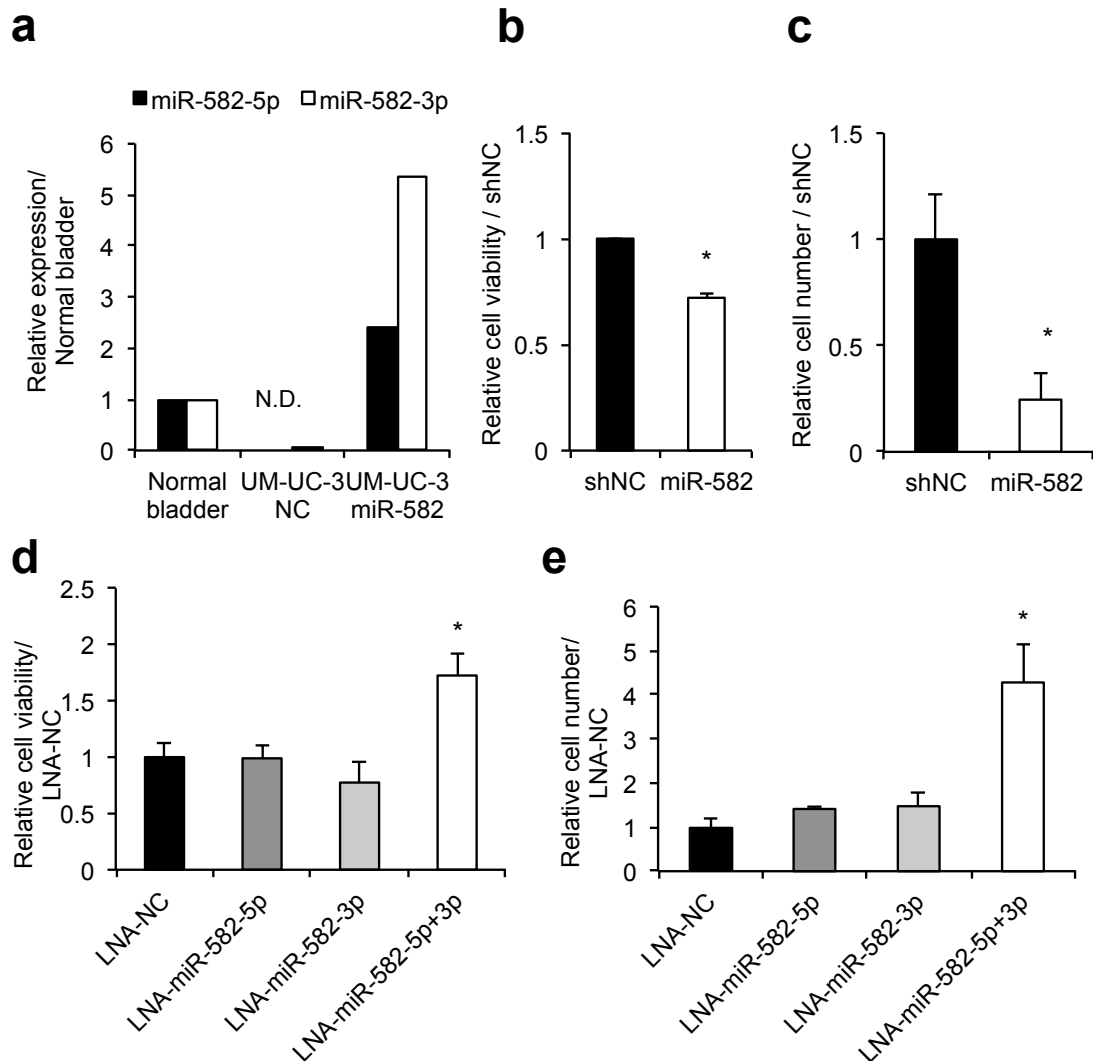

**Supplementary Figure S3. Functional analysis of UM-UC-3-miR-582 cells.** (a) qRT-PCR analysis shows the relative expression level of miR-582-5p and -3p in UM-UC-3-miR-582 cells. The relative expression of miR-582-5p and -3p was calculated compared with the level of normal bladder. (b) Cell proliferation assay ( $n=6$ ). (c) Cell invasion assay. The invasive values were normalized to the values from the UM-UC-3-shNC cells ( $n=4$ ). (d) Effect of LNA-miR-582-5p and -3p on cell proliferation. The proliferation values were normalized to values from cells treated with LNA-NC ( $n=6$ ). (e) Effect of LNA-miR-582-5p and -3p on invasion. The invasive values were normalized to the values from the cells treated with LNA-NC ( $n=3$ ). \* $P < 0.05$  versus NC.
