# Supplementary material
Source: PubMed Central journal article supplement (PMC3589153)
Supplement: mt2012269x4.pdf [file mt2012269x4.pdf]

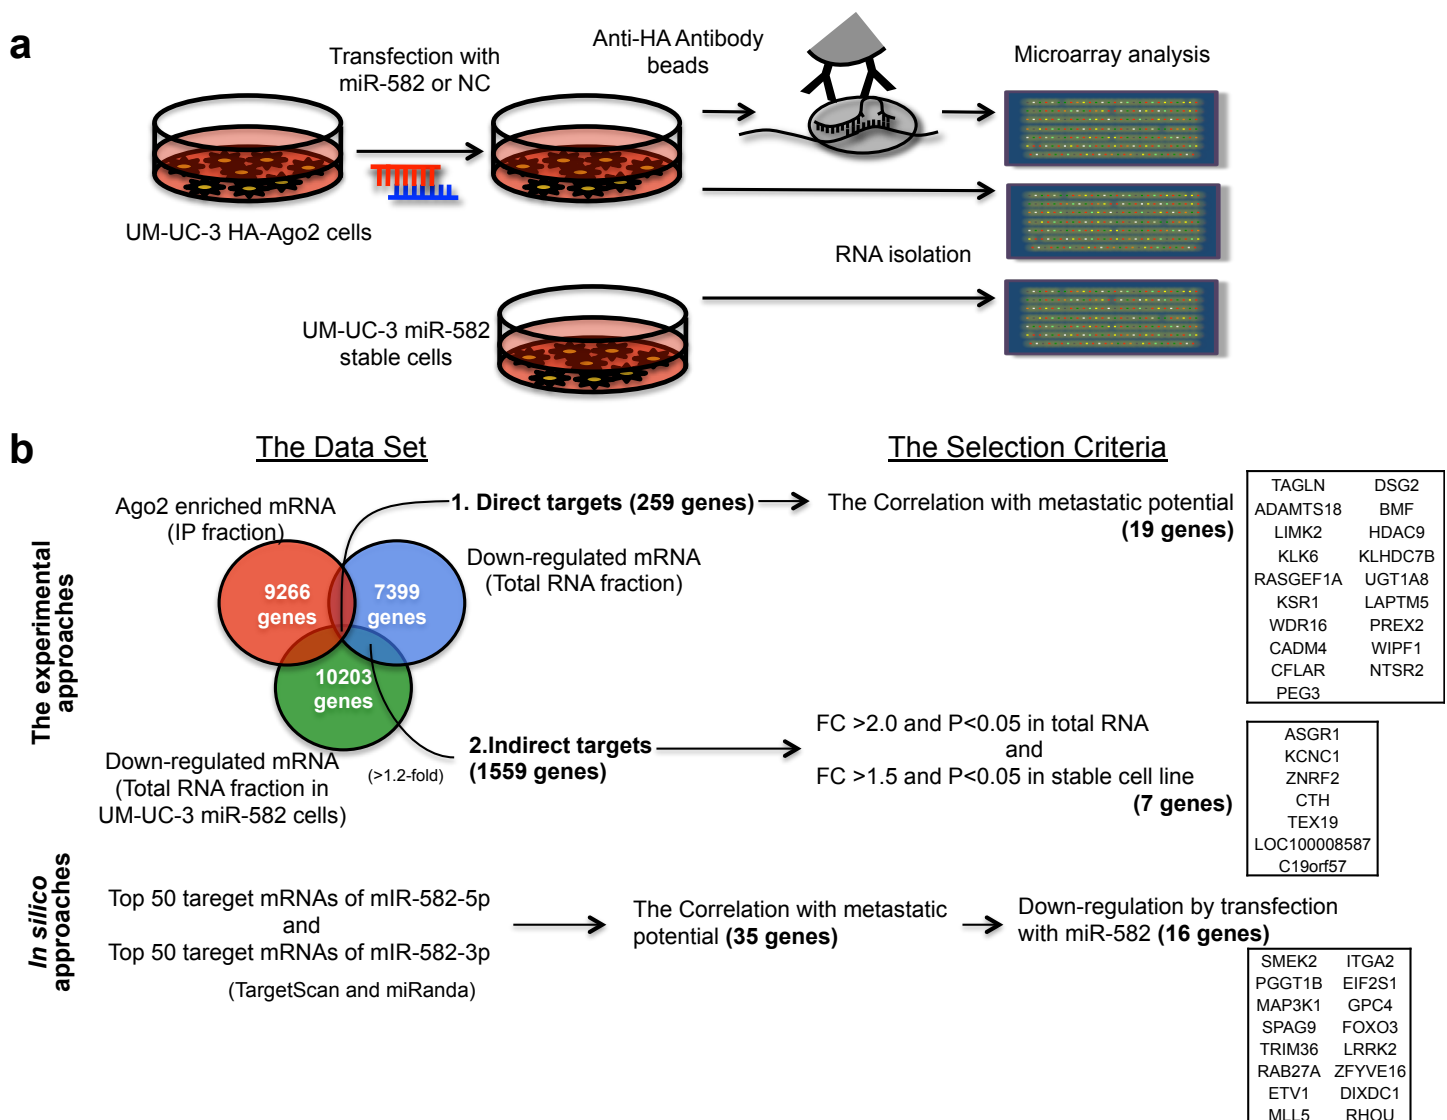

**Supplementary Figure S4.** Identification of miR-582-5p and -3p target genes using HA-Ago2 IP and microarray analysis. (a) Schematic illustration of the biochemical identification of miRNA targets using Ago2-IP and microarray analysis. The HA-Ago2 proteins were co-IPed with the anti-HA antibodies bound to agarose beads. (b) Selection process and criteria for miR-582 targets. Venn diagram showing the number of up-regulated mRNAs in the IPed fraction (red), down-regulated mRNAs in UM-UC-3-HA-Ago2 cells, which were transfected with miR-582 (blue), and down-regulated mRNAs in UM-UC-3-miR-582 cells (green). miR-582 direct and indirect targets were identified as common to these three or two fractions.
