# Supplementary material
Source: PubMed Central journal article supplement (PMC3589153)
Supplement: mt2012269x5.pdf [file mt2012269x5.pdf]

**Supplementary Table S1.** Copy number losses detected in UM-UC-3 cell line.

| <b>Chromosome Number</b> |                                                                                                                                                                                                                                                                                            |
|--------------------------|--------------------------------------------------------------------------------------------------------------------------------------------------------------------------------------------------------------------------------------------------------------------------------------------|
| UM-UC-3 <sup>24</sup>    | 1q21.1–q31.3, 1q31.3–q42.2, 1q42.3–qter, 2p12–pter, 2p11.2–qter, 3p25.3–q26.1, 3p25.2–q11.1, 4p11–pter, 4q12–q25, 4q25–qter, 5q11.2–q13.1, 6p12.1–p21.32, 7p14.3–p21.3, 9q13–q22.31, 10p11.21–pter, 10q11.23–q21.2, 13q12.11–q13.1, 15q11.2–q21.2, 15q23–qter, 16q23.1–qter, 18q11.1–q12.1 |
