# Supplementary material
Source: PubMed Central journal article supplement (PMC3589153)
Supplement: mt2012269x6.pdf [file mt2012269x6.pdf]

**Supplementary Table S2.** Copy number losses correlated with pathological stage in human bladder cancer.

| <b>Chromosome Number</b> | <b>Ta</b> | <b>T1</b> | <b>T2-4</b> | <b>miRNA</b>                    |
|--------------------------|-----------|-----------|-------------|---------------------------------|
| 3p11-12 <sup>22</sup>    | 17%       | 15%       | 40%         | miR-1305                        |
| 4q32-34 <sup>23</sup>    | 15%       | 37%       | 36%         | miR-1324<br>miR-578<br>miR-1979 |
| 5q12-13 <sup>11</sup>    | 0%        | 9%        | 33%         | miR-582                         |
