# Supplementary material
Source: PubMed Central journal article supplement (PMC3589153)
Supplement: mt2012269x7.pdf [file mt2012269x7.pdf]

**Table S3.** Stage and Grade distribution of the patients.

| <b>Patients</b> | <b>Stage</b> | <b>Grade</b> |
|-----------------|--------------|--------------|
| 1               | pTa          | I            |
| 2               | pTa          | I            |
| 3               | pTa          | I            |
| 4               | pTa          | I            |
| 5               | pTa          | I            |
| 6               | pTa          | I            |
| 7               | pTa          | I            |
| 8               | pTa          | I            |
| 9               | pT1          | I            |
| 10              | pTis         | II           |
| 11              | pTa          | II           |
| 12              | pTa          | II           |
| 13              | pTa          | II           |
| 14              | pTa          | II           |
| 15              | pTa          | II           |
| 16              | pTa          | II           |
| 17              | pTa          | II           |
| 18              | pT1          | II           |
| 19              | pT1          | II           |
| 20              | pT1          | II           |
| 21              | pT2          | II           |
| 22              | pT1          | III          |
| 23              | pT1          | III          |
| 24              | pT1          | III          |
| 25              | pT1          | III          |
| 26              | pT2          | III          |
| 27              | pT2          | III          |
| 28              | pT3a         | III          |
