# Supplementary material
Source: PubMed Central journal article supplement (PMC3589153)
Supplement: mt2012269x11.pdf [file mt2012269x11.pdf]

**Supplementary Table S7.** PCR primers and oligonucleotide sequences.

| Gene        | Primers | Oligonucleotide Sequence(5'-3') |
|-------------|---------|---------------------------------|
| pri-miR-582 | Forward | GCACACATTGAAGAGGACAGAC          |
|             | Reverse | TATTGAAGGGGGTTCTGGTG            |
| PDE4D       | Forward | ATCCGACAGCGATTATGACC            |
|             | Reverse | CAAGACCTGAGCAAATGGAG            |
| KCNC1       | Forward | ATCTGGGCGCTCTTCGAG              |
|             | Reverse | TCGATCTCCGTCTTGTTAC             |
| PGGT1B      | Forward | AGCGCTATTCTTCACTCGAGAC          |
|             | Reverse | CCTGCAGGGAATAAATCCAC            |
| LRRK2       | Forward | GGGCTACAACCGGAAAATAC            |
|             | Reverse | TGATGTCCCAAACGGTCAAG            |
| RAB27A      | Forward | AAGAGGAGGAAGCCATAGCAC           |
|             | Reverse | CCATTGGCAGCACTAGTTTC            |
| DIXDC1      | Forward | TACGAAGGGCAACAAAGGTC            |
|             | Reverse | AATGGACTCGCTCTTTGCAC            |
| B-actin     | Forward | GGCACCACCATGTACCCTG             |
|             | Reverse | CACGGAGTACTTGCGCTCAG            |
