# Supplementary material
Source: PubMed Central journal article supplement (PMC3589153)
Supplement: mt2012269x12.pdf [file mt2012269x12.pdf]

**Supplementary Table S8.** miRNA and siRNA oligonucleotide sequences.

|                      |           | Oligonucleotide Sequence(5'-3') |
|----------------------|-----------|---------------------------------|
| Hsa-miR-582          | Sense     | UUACAGUUGUUCAACCAGUUACU         |
|                      | Antisense | UAACUGGUUGAACAACUGAACC          |
| miR-582-5p           | Sense     | UUACAGUUGUUCAACCAGUUACUAA       |
|                      | Antisense | AGU AACUGGUUGAACAACUGUAAAA      |
| miR-582-3p           | Sense     | UAACUGGUUGAACAACUGAACCAA        |
|                      | Antisense | GGUUCAGUUGUUCAACCAGUUAAA        |
| Hsa-miR-582-scramble | Sense     | UACGUACGUCGUCUAAUUAUUCU         |
|                      | Antisense | AUUAAUUAGACGACGUACGACC          |
| siRNA-KCNC1          | Sense     | CCAACAAGGUAGAGUUCAUdTdT         |
|                      | Antisense | AUGAACUCUACCUUGUUGGdTdT         |
| siRNA-PGGT1B         | Sense     | GAGACAAGCAGGUUGACAAdTdT         |
|                      | Antisense | UUGUCAACCUUGUCUCdTdT            |
| siRNA-LRRK2          | Sense     | GCAAAUGAACUAAGAGAUdTdT          |
|                      | Antisense | UAUCUCUUAGUUCAUUUGCdTdT         |
| siRNA-RAB27A         | Sense     | GGACCAGAGAGUAGUGAAAdTdT         |
|                      | Antisense | UUUCACUACUCUCUGGUCCdTdT         |
| siRNA-DIXDC1         | Sense     | GAACAGAACAGAAGGGACAdTdT         |
|                      | Antisense | UGUCCCUUCUGUUCUGUUCdTdT         |
