# Supplementary material
Source: PubMed Central journal article supplement (PMC3589153)
Supplement: mt2012269x13.pdf [file mt2012269x13.pdf]

**Supplementary Table S9.** PCR primer sequences for Luciferase assay.

The number of miRNA binding sites was predicted by publicly available algorithms (TargetScan 5.1, [www.targetscan.org](http://www.targetscan.org); miRNA.org, [www.microrna.org](http://www.microrna.org)).

| Target 3'UTR | Location       | Primers | Oligonucleotide Sequence(5'-3')     |
|--------------|----------------|---------|-------------------------------------|
| KCNC1        | Site-1         | Forward | GCTCGAGTAACCCAGAGTTCTTCCCATTCA      |
|              |                | Reverse | GCGGCCGCAAAGTCAGCACAGCTGGCTTTT      |
|              | Site-2         | Forward | GCTCGAGTAAGCTCTTTTTGACCAGGATGG      |
|              |                | Reverse | GCGGCCGCAATCTGGTACATAACCGGCAGTT     |
| PGGT1B       | 1,178-2,713 bp | Forward | GCTCGAGTAAGGGGGATTTGTAGCATAACTG     |
|              |                | Reverse | GCGGCCGCAATACTTTTTCCCCCACCATCA      |
| LRRK2        | 7,777-9130 bp  | Forward | GCTCGAGTAATCACATGGAAAGGGTACTCACA    |
|              |                | Reverse | GCGGCCGCAACAATGAAAGAGATAAACTGGAACA  |
| RAB27A       | 1,988-2,533 bp | Forward | GCTCGAGTAAGATGTTTCATATTGAAGCAGTCACA |
|              |                | Reverse | GCGGCCGCAATGGGAGTAGTGGAAGGACAG      |
| DIXDC1       | Site-1         | Forward | GCTCGAGTAATGAATTGTTGCTTGGATGGA      |
|              |                | Reverse | GCGGCCGCAATGTTTGCTGAGAGAAAACTGACA   |
|              | Site-2         | Forward | GCTCGAGTAACCACAGGTAATGACCAAGCA      |
|              |                | Reverse | GCGGCCGCAATGCAAACCCCATTTTATTCA      |
